# Supplementary material for: Impact of Low Skeletal Muscle Mass on Long-Term Outcomes in Hepatocellular Carcinoma Treated with Trans-Arterial Radioembolization: A Retrospective Multi-Center Study
Source: MDPI journal article supplement (doi:10.3390/cancers15215195), 2023-10-28
Supplement: s1 [file s1]

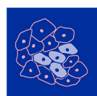

**Table S1.** Details of TARE procedure.

| Variables                   | Total<br>( <i>n</i> = 347) | Non sarcopenic<br>( <i>n</i> = 221) | Sarcopenic<br>( <i>n</i> =126) | <i>p</i> value |
|-----------------------------|----------------------------|-------------------------------------|--------------------------------|----------------|
| Hepatopulmonary shunt (%)   | 6.7 (4.8–9.7)              | 6.7 (5.0–9.5)                       | 6.6 (4.4–10.3)                 | 0.780          |
| Type of microsphere         |                            |                                     |                                |                |
| Resin                       | 212 (61.1%)                | 145 (65.6%)                         | 67 (53.2%)                     | 0.022          |
| Glass                       | 135 (38.9%)                | 79 (34.4%)                          | 59 (46.8%)                     |                |
| Administered activity (GBq) | 2.5 (1.7–3.4)              | 2.5 (1.7–3.1)                       | 2.7 (1.6–3.8)                  | 0.210          |

Variables expressed as median (interquartile range) or *n* (%); TARE, trans-arterial radioembolization.
